# Supplementary material for: A Novel Plasmid DNA-Based Foot and Mouth Disease Virus Minigenome for Intracytoplasmic mRNA Production
Source: MDPI journal article supplement (doi:10.3390/v13061047), 2021-06-01
Supplement: s1 [file s1]

## SUPPLEMENT DATA

### SUPPLEMENTARY TABLE

**Table S1:** Comparison of the differences between mean  $\pm$  standard deviation of log10 titers at each time point

| Viruses           | Mean $\pm$ SD of log10 titers at different time points (hours post inoculation) |                            |                             |                            |                             |                            | Overall                     |
|-------------------|---------------------------------------------------------------------------------|----------------------------|-----------------------------|----------------------------|-----------------------------|----------------------------|-----------------------------|
|                   | 4                                                                               | 8                          | 12                          | 16                         | 20                          | 24                         |                             |
| O189              | 0.8 <sup>a</sup> $\pm$ 1.4                                                      | 3.3 <sup>a</sup> $\pm$ 0.3 | 3.7 <sup>a</sup> $\pm$ 0.3  | 3.6 <sup>a</sup> $\pm$ 0.1 | 4.0 <sup>b</sup> $\pm$ 0.3  | 5.4 <sup>a</sup> $\pm$ 0.1 | 3.5 <sup>a</sup> $\pm$ 1.5  |
| Asia I            | 1.7 <sup>a</sup> $\pm$ 1.4                                                      | 2.7 <sup>b</sup> $\pm$ 0.0 | 3.3 <sup>a</sup> $\pm$ 0.3  | 3.5 <sup>a</sup> $\pm$ 0.5 | 4.1 <sup>ab</sup> $\pm$ 0.4 | 4.0 <sup>b</sup> $\pm$ 0.4 | 3.2 <sup>a</sup> $\pm$ 1.0  |
| A/lopburi         | 0.8 <sup>a</sup> $\pm$ 1.4                                                      | 3.4 <sup>a</sup> $\pm$ 0.1 | 2.6 <sup>ab</sup> $\pm$ 2.2 | 3.4 <sup>a</sup> $\pm$ 0.1 | 4.6 <sup>a</sup> $\pm$ 0.1  | 3.9 <sup>b</sup> $\pm$ 0.4 | 3.1 <sup>ab</sup> $\pm$ 1.5 |
| O/41              | 2.5 <sup>a</sup> $\pm$ 0.0                                                      | 2.5 <sup>b</sup> $\pm$ 0.0 | 2.5 <sup>ab</sup> $\pm$ 0.0 | 2.5 <sup>b</sup> $\pm$ 0.0 | 2.5 <sup>c</sup> $\pm$ 0.0  | 2.5 <sup>c</sup> $\pm$ 0.0 | 2.5 <sup>b</sup> $\pm$ 0.0  |
| Non-virus control | 0.0 <sup>a</sup> $\pm$ 0.0                                                      | 0.0 <sup>c</sup> $\pm$ 0.0 | 0.0 <sup>ab</sup> $\pm$ 0.0 | 0.0 <sup>c</sup> $\pm$ 0.0 | 0.0 <sup>d</sup> $\pm$ 0.0  | 0.0 <sup>d</sup> $\pm$ 0.0 | 0.0 <sup>c</sup> $\pm$ 0.0  |

**Note:** The different letters over the mean titers at each time point indicate statistically significant differences.
